# Supplementary material
Source: PubMed Central journal article supplement (PMC7903411)
Supplement: 13721_2020_276_MOESM1_ESM.pdf [file 13721_2020_276_MOESM1_ESM.pdf]

**Estimation of drug-likeness properties of GC-MS separated bioactive compounds in rare medicinal *Pleione maculata* using molecular docking technique and SwissADME *insilico* tools**

Symplicia Hakani D\*

Department of Biotechnology, School of Biosciences, Assam Don Bosco University, Tapesia, Kamarkuchi,  
Sonapur-782402, Assam, India

**Supportive/Supplementary materials**

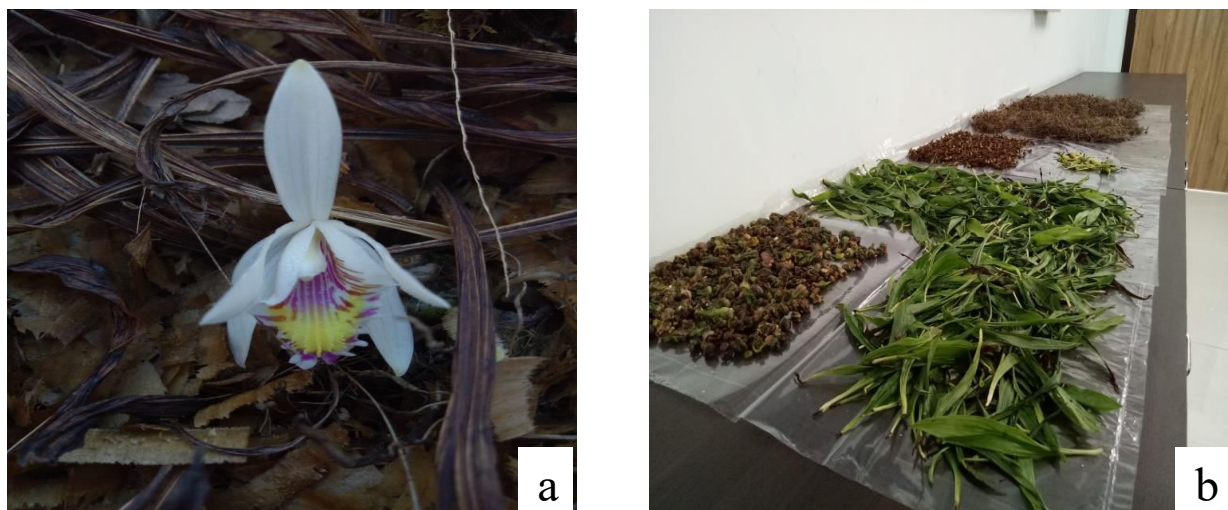

**Figure 1: *Pleione maculata* (a) flowers and (b) drying process**

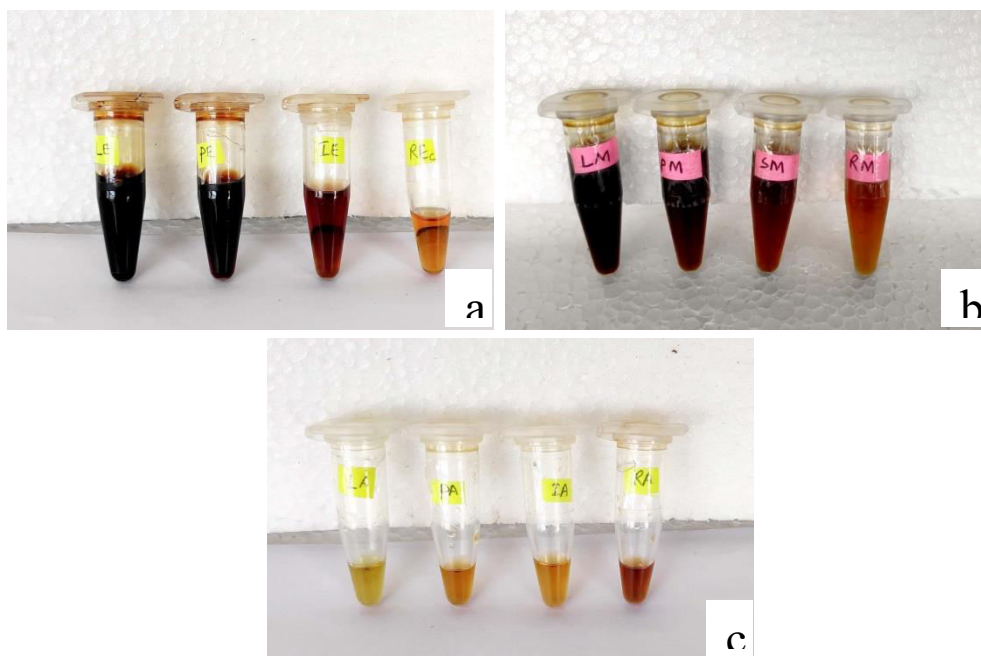

**Figure 2: Extracts of *Pleione maculata* prepared in (a) ethanol (b) methanol and (c) acetone extracts for GC-MS analysis**
